# Supplementary material for: N2binding to the E0–E4states of nitrogenase
Source: Royal Society of Chemistry journal article supplement (doi:10.1039/d3dt00648d), 2023-01-01
Supplement: d3dt00648d2.pdf [file d3dt00648d2.pdf]

*Supplementary Material*

**N<sub>2</sub> binding to the E<sub>0</sub>–E<sub>4</sub> states of nitrogenase**

**Hao Jiang and Ulf Ryde \***

Department of Theoretical Chemistry, Lund University, Chemical Centre, P. O. Box 124,  
SE-221 00 Lund, Sweden

Correspondence to Ulf Ryde, E-mail: [Ulf.Ryde@teokem.lu.se](mailto:Ulf.Ryde@teokem.lu.se),

Tel: +46 – 46 2224502, Fax: +46 – 46 2228648

2023-05-26

**Table S1.** Relative energies (in kJ/mol) for the best structures calculated with two basis set, def2-SV(P) (SV) and def2-TZVPD (TZ) (the latter single-point energy calculations on the def2-DSV(P) structures). Energies that change by more than 20 kJ/mol are marked in bold face and the corresponding spin populations are shown in Table S2.

| $E_n$          | Structure  | TPSS  |              | r <sup>2</sup> SCAN |             |
|----------------|------------|-------|--------------|---------------------|-------------|
|                |            | SV    | TZ           | SV                  | TZ          |
| E <sub>1</sub> | Fe2+N2     | 31.0  | 39.4         | 39.1                | 45.5        |
|                | Fe6+N2     | 0.0   | 0.0          | 0.0                 | 0.0         |
|                | Fe2-N2     | 31.1  | 47.3         | 42.9                | 59.5        |
|                | Fe6-N2     | 24.1  | 29.3         | 60.3                | 75.0        |
| E <sub>2</sub> | Fe2+N2 H6S | 47.8  | 44.8         | 11.5                | 7.6         |
|                | C2         | 191.6 | 201.8        | 126.1               | 128.1       |
|                | Fe6+N2 H2F | 76.2  | 71.9         | 44.8                | 40.1        |
|                | Fe2-N2 H6S | 6.2   | 2.5          | 0.0                 | 0.0         |
|                | C2         | 184.3 | 193.8        | 124.2               | 134.4       |
|                | Fe6-N2 H2F | 0.0   | 0.0          | 17.8                | 17.2        |
| E <sub>3</sub> | Fe2+N2 S6M | 58.6  | <b>91.7</b>  | 30.6                | 27.6        |
|                | 35_3       | 110.9 | 111.3        | 63.5                | 57.4        |
|                | C3         | 250.8 | 261.0        | 156.2               | 153.8       |
|                | Fe6+N2 S2S | 74.1  | 66.7         | 98.2                | 98.4        |
|                | Fe2-N2 S6M |       |              | 0.0                 | 0.0         |
|                | 35_3       | 78.4  | 83.4         | 47.7                | 47.5        |
|                | C3         | 227.4 | 224.5        | 153.6               | 142.2       |
|                | Fe6-N2 S2S | 0.0   | 0.0          | 29.4                | 28.6        |
| E <sub>4</sub> | Fe2+N2 S6S | 75.7  | 60.7         | 47.0                | <b>5.2</b>  |
|                | Fe6+N2 S2S | 80.7  | 77.3         | 68.5                | 53.9        |
|                | Fe2-N2 S6S | 35.1  | 15.5         | 0.0                 | 0.0         |
|                | 3523       | 32.0  | 13.6         | 47.4                | 64.2        |
|                | C3         | 202.3 | <b>229.6</b> | 67.7                | <b>14.0</b> |
|                | Fe6-N2 S2S | 0.0   | 0.0          | 10.7                | 3.5         |

**Table S2.** Mulliken spin populations obtained with the def2-SV(P) (SV) and def2-TZVPD (TZ) basis sets (the latter single-point energy calculations on the def2-DSV(P) structures) for the four structures for which the relative energies change by more than 20 kJ/mol in Table S1. For the E<sub>3</sub> state, the BS state changes from BS14 to BS147. For the other three, several spin populations change by more than 1 *e* (marked in bold face), indicating that the electronic structure has changed extensively.

| E <sub>n</sub> | Structure | DFT                     | def2-SV(P) |      |      |      |      |     |      |      | def2-TZVPD |             |      |      |      |            |             |             |
|----------------|-----------|-------------------------|------------|------|------|------|------|-----|------|------|------------|-------------|------|------|------|------------|-------------|-------------|
|                |           |                         | Fe1        | Fe2  | Fe3  | Fe4  | Fe5  | Fe6 | Fe7  | Mo   | Fe1        | Fe2         | Fe3  | Fe4  | Fe5  | Fe6        | Fe7         | Mo          |
| E <sub>3</sub> | Fe6+N2    | S2S TPSS                | -3.2       | 2.3  | 2.5  | -3.2 | 2.4  | 1.2 | 1.0  | 0.5  | -3.0       | <b>3.5</b>  | 2.4  | -2.7 | 2.7  | 1.5        | <b>-0.5</b> | -0.7        |
| E <sub>4</sub> | Fe2+N2    | S6S r <sup>2</sup> SCAN | -3.7       | 2.7  | 3.2  | 3.3  | -3.2 | 2.4 | -3.1 | -0.6 | -3.4       | <b>4.4</b>  | 2.4  | 3.5  | -3.7 | <b>1.0</b> | -3.5        | <b>2.5</b>  |
|                | Fe2-N2    | C3 TPSS                 | 3.1        | -3.0 | -3.4 | -3.4 | 2.9  | 3.1 | 2.8  | -0.8 | 3.0        | -3.0        | -3.2 | -3.4 | 2.9  | 3.7        | <b>0.8</b>  | -1.1        |
|                |           | r <sup>2</sup> SCAN     | 3.7        | -2.3 | -3.1 | -3.2 | 3.3  | 0.3 | 3.1  | -1.4 | 3.0        | <b>-4.2</b> | -2.6 | -3.8 | 3.6  | 1.0        | 3.6         | <b>-3.4</b> |

**Table S3.** N<sub>2</sub>-binding energies ( $\Delta E_{N_2}$  in kJ/mol) for the best structures calculated with two basis set, def2-SV(P) (SV) and def2-TZVPD (TZ) (the latter single-point energy calculations on the def2-DSV(P) structures). Binding energies for the other complexes can be obtained by summing  $\Delta E_{N_2}$  in this table with the relative energies in Table S1.

| E <sub>n</sub> | Structure | TPSS |       | r <sup>2</sup> SCAN |           |
|----------------|-----------|------|-------|---------------------|-----------|
|                |           | B1   | B2    | B1                  | B2        |
| E <sub>1</sub> | Fe6+N2    | 1.9  | 12.7  | -1.7                | 7.4       |
| E <sub>2</sub> | Fe6-N2    | H2F  | -10.9 | -18.0               | 34.5 53.2 |
| E <sub>3</sub> | Fe2-N2    | S6M  |       | 9.6                 | 23.0      |
|                | Fe6-N2    | S2S  | -45.5 | -34.5               |           |
| E <sub>4</sub> | Fe2-N2    | S6S  |       | -18.5               | -7.0      |
|                | Fe6-N2    | S2S  | -50.9 | -33.4               |           |
